# Supplementary material
Source: PubMed Central journal article supplement (PMC6422095)
Supplement: supp_RA118.006986_142346_1_supp_254384_pk01fb.pdf [file supp_RA118.006986_142346_1_supp_254384_pk01fb.pdf]

| Activator<br>Inhibitor<br>No effect                                          | Compounds*EC                                                                       | Verified<br>with pure<br>compounds | EC50      | Class/Function of compounds                                                       |
|------------------------------------------------------------------------------|------------------------------------------------------------------------------------|------------------------------------|-----------|-----------------------------------------------------------------------------------|
| <b>INSULIN SENSITIZERS</b>                                                   |                                                                                    |                                    |           |                                                                                   |
| A                                                                            | Pioglitazone Hydrochloride                                                         | Y                                  | 0.6 µM    | thiazolidinedione                                                                 |
| A                                                                            | Ciglitazone                                                                        | Y                                  | 4.9 µM    | thiazolidinedione                                                                 |
| A                                                                            | Rosiglitazone                                                                      | Y                                  | -         | thiazolidinedione                                                                 |
| A                                                                            | Rosiglitazone Maleate                                                              | -                                  | -         | thiazolidinedione                                                                 |
| A                                                                            | Osufiram (Thiazum)                                                                 | Y                                  | 10 µM     | acetylaldehyde dehydrogenase inhibitor                                            |
| <b>DIS-INHIBITORS</b>                                                        |                                                                                    |                                    |           |                                                                                   |
| A                                                                            | Everolimus (Rapamycin)                                                             | Y                                  | 0.16 nM   | immunosuppressant; mTORC1 inhibitor                                               |
| No                                                                           | Cyclosporin A, FK506                                                               | Y                                  | -         | immunosuppressants; not active against mTORC1                                     |
| <b>BETA-ADRENERGIC agonists and inverse agonists/antagonists</b>             |                                                                                    |                                    |           |                                                                                   |
| A                                                                            | Isoproterenol Hydrochloride                                                        | Y                                  | 14 nM     | beta adrenergic receptor agonist                                                  |
| A                                                                            | Mesoprololol                                                                       | Y                                  | 4.9 µM    | beta adrenergic receptor agonist                                                  |
| A                                                                            | Clenbuterol Hydrochloride                                                          | -                                  | -         | beta adrenergic receptor agonist                                                  |
| A                                                                            | Dobutamine Hydrochloride                                                           | -                                  | -         | beta adrenergic receptor agonist                                                  |
| A                                                                            | Isoetharine Mesylate Salt                                                          | -                                  | -         | beta adrenergic receptor agonist                                                  |
| A                                                                            | Isoxsuprine Hydrochloride                                                          | -                                  | -         | beta adrenergic receptor agonist                                                  |
| A                                                                            | Levalbuterol Hydrochloride                                                         | -                                  | -         | beta adrenergic receptor agonist                                                  |
| A                                                                            | Levonastelinolol                                                                   | -                                  | -         | beta adrenergic receptor agonist                                                  |
| A                                                                            | Terbutaline Hemisulfate                                                            | Y                                  | -         | beta adrenergic receptor agonist                                                  |
| A                                                                            | Tulobuterol                                                                        | -                                  | -         | beta adrenergic receptor agonist                                                  |
| I                                                                            | Propranolol hydrochloride                                                          | -                                  | 8 µM      | beta adrenergic antagonist/inverse agonist                                        |
| I                                                                            | (S)-propranolol hydrochloride                                                      | -                                  | -         | beta adrenergic antagonist/inverse agonist                                        |
| I                                                                            | (R)-Propranolol hydrochloride                                                      | -                                  | -         | beta adrenergic antagonist/inverse agonist                                        |
| A                                                                            | Epinastine                                                                         | Y                                  | 6.5 µM    | beta adrenergic receptor agonist                                                  |
| A                                                                            | Foraskolin                                                                         | Y                                  | 1.5 µM    | activates adenylate cyclase, increases cAMP and cGMP                              |
| <b>ADENOSINE RECEPTORS: agonists and inverse agonists/antagonists</b>        |                                                                                    |                                    |           |                                                                                   |
| A                                                                            | 2-Chloroadenosine                                                                  | Y                                  | 0.2 µM    | purine analog, adenosine receptor agonist                                         |
| I                                                                            | CGS 15943                                                                          | -                                  | -         | adenosine receptor antagonist/inverse agonist                                     |
| I                                                                            | NE-methyladenosine                                                                 | -                                  | -         | naturally occurring adenosine analog                                              |
| I                                                                            | Isomethylxanthine (IBMX)                                                           | Y                                  | 0.5 mM    | adenosine receptor antagonist/inverse agonist; PDE inhibitor (IC50 2-50 µM)       |
| <b>CORTICOSTEROIDS</b>                                                       |                                                                                    |                                    |           |                                                                                   |
| A                                                                            | Flumethasone Phosphate                                                             | Y                                  | 2.5 nM    | Steroid                                                                           |
| A                                                                            | Fluorometholone                                                                    | Y                                  | -         | Steroid                                                                           |
| A                                                                            | Flurandrenolide                                                                    | Y                                  | -         | Steroid                                                                           |
| A                                                                            | Flu-Acetoxy Progesterone                                                           | -                                  | -         | Steroid                                                                           |
| A                                                                            | 18-Morketosterone                                                                  | -                                  | -         | Steroid                                                                           |
| A                                                                            | Betamethasone                                                                      | -                                  | -         | Steroid                                                                           |
| A                                                                            | Halobutolone                                                                       | -                                  | -         | Steroid                                                                           |
| A                                                                            | Methylprednisolone                                                                 | -                                  | -         | Steroid                                                                           |
| A                                                                            | Methylprednisolone Acetate                                                         | -                                  | -         | Steroid                                                                           |
| A                                                                            | Prednicarbate                                                                      | -                                  | -         | Steroid                                                                           |
| A                                                                            | Prednisolone Acetate                                                               | -                                  | -         | Steroid                                                                           |
| A                                                                            | Prednisone                                                                         | -                                  | -         | Steroid                                                                           |
| A                                                                            | Triamcinolone Acetonide                                                            | -                                  | -         | Steroid                                                                           |
| A                                                                            | Dexamethasone                                                                      | Y                                  | 9 nM      | Steroid                                                                           |
| <b>ANDROGENIC STEROIDS</b>                                                   |                                                                                    |                                    |           |                                                                                   |
| I                                                                            | Testosterone Propionate                                                            | -                                  | -         | androgen receptor agonist; steroid                                                |
| A                                                                            | Flutamide                                                                          | -                                  | -         | androgen receptor antagonist; non-steroidal                                       |
| <b>CARDIOTONIC STEROIDS</b>                                                  |                                                                                    |                                    |           |                                                                                   |
| A                                                                            | Proxalindin A                                                                      | Y                                  | -         | Na <sup>+</sup> /K <sup>+</sup> ATPase inhibitor                                  |
| A                                                                            | Medrysone                                                                          | Y                                  | -         | Na <sup>+</sup> /K <sup>+</sup> ATPase inhibitor                                  |
| A                                                                            | Strophantidin                                                                      | Y                                  | -         | Na <sup>+</sup> /K <sup>+</sup> ATPase inhibitor                                  |
| A                                                                            | Quaban                                                                             | Y                                  | 13 µM     | Na <sup>+</sup> /K <sup>+</sup> ATPase inhibitor                                  |
| <b>ANTI-BIOTICS</b>                                                          |                                                                                    |                                    |           |                                                                                   |
| I                                                                            | Proguanil hydrochloride                                                            | -                                  | -         | anti-biotic (anti-malaria)                                                        |
| I                                                                            | Niclosamide                                                                        | -                                  | -         | anti-biotic (anti-nematode)                                                       |
| I                                                                            | Amaziracine                                                                        | -                                  | -         | anti-biotic (anti-neoplasic)                                                      |
| I                                                                            | Homoharringtonine                                                                  | -                                  | -         | anti-biotic (anti-neoplasic); phytochemical; medicinal herb, active compound      |
| I                                                                            | Cetylpyridinium chloride                                                           | -                                  | -         | antiseptic/antimicrobial                                                          |
| <b>PROTEIN SYNTHESIS INHIBITORS</b>                                          |                                                                                    |                                    |           |                                                                                   |
| I                                                                            | Fluoremycin dihydrochloride                                                        | Y                                  | 13 µM     | protein synthesis inhibitor                                                       |
| I                                                                            | Lycorine hydrochloride                                                             | Y                                  | 6.3 µM    | protein synthesis inhibitor (putative inhibitor of Akt phosphorylation)           |
| I                                                                            | Cycloheximide                                                                      | -                                  | -         | protein synthesis inhibitor                                                       |
| I                                                                            | Anisomycin                                                                         | -                                  | -         | protein synthesis inhibitor                                                       |
| I                                                                            | Cephaline                                                                          | -                                  | -         | protein synthesis inhibitor                                                       |
| I                                                                            | Emetine                                                                            | -                                  | -         | protein synthesis inhibitor                                                       |
| <b>HETEROCYCLIC AMINES</b>                                                   |                                                                                    |                                    |           |                                                                                   |
| I                                                                            | Paroxetine hydrochloride (Paxil)                                                   | Y                                  | -         | antidepressant; 5HT <sub>2</sub> antagonist; serotonin reuptake inhibitor         |
| I                                                                            | Maprotiline hydrochloride                                                          | Y                                  | 32 µM     | tetracyclic antidepressant; NE reuptake inh. antagonist; H1, α1, 5HT <sub>2</sub> |
| I                                                                            | Desipramine hydrochloride                                                          | -                                  | -         | TCA, dibenzazepine; NE reuptake inhibitor; antagonist; H1, α1, 5HT <sub>2</sub>   |
| I                                                                            | Imipramine hydrochloride                                                           | -                                  | -         | TCA, dibenzazepine; NE reuptake inhibitor; antagonist; H1, α1, 5HT <sub>2</sub>   |
| I                                                                            | Norcytobenzaprine                                                                  | -                                  | -         | TCA, dibenzazepine; NE reuptake inhibitor; antagonist; H1, α1, 5HT <sub>2</sub>   |
| I                                                                            | Protriptyline hydrochloride                                                        | -                                  | -         | TCA, dibenzazepine; NE reuptake inhibitor; antagonist; H1, α1, 5HT <sub>2</sub>   |
| I                                                                            | Nortriptyline hydrochloride                                                        | -                                  | -         | TCA, dibenzazepine; NE reuptake inhibitor; antagonist; H1, α1, 5HT <sub>2</sub>   |
| I                                                                            | Homochlorcyclizine                                                                 | -                                  | -         | antihistamine, diazepine, antagonist; H1                                          |
| I                                                                            | Azelastine hydrochloride                                                           | -                                  | -         | antihistamine, pthalazine; antagonist; H1                                         |
| I                                                                            | Promethazine hydrochloride                                                         | -                                  | -         | antihistamine, phenothiazine, antagonist; H1                                      |
| I                                                                            | Promazine hydrochloride                                                            | -                                  | -         | antipsychotic, phenothiazine, antagonist; D2                                      |
| I                                                                            | Thioridazine hydrochloride                                                         | -                                  | -         | antipsychotic, phenothiazine, antagonist; D2, α1, 5HT <sub>2</sub>                |
| I                                                                            | Bromperidol                                                                        | -                                  | -         | antipsychotic, butyrophenone, antagonist; D2, α1, 5HT <sub>2</sub>                |
| I                                                                            | Haloperidol                                                                        | -                                  | -         | antipsychotic, butyrophenone, antagonist; D2, α1, 5HT <sub>2</sub>                |
| A                                                                            | Methylperone Hydrochloride                                                         | -                                  | -         | antipsychotic, butyrophenone, antagonist; D2, α1, 5HT <sub>2</sub>                |
| R(+)-SCH 23390 Hydrochloride                                                 | -                                                                                  | -                                  | -         | habenzazepine; antagonist; D1                                                     |
| I                                                                            | Quinidine hydrochloride                                                            | -                                  | -         | agonist; D2, D3                                                                   |
| I                                                                            | Naphazoline hydrochloride                                                          | -                                  | -         | indazole; agonist; α1                                                             |
| I                                                                            | Rimcazone dihydrochloride                                                          | -                                  | -         | dopamine reuptake inhibitor; antagonist; α1                                       |
| I                                                                            | Isosergine                                                                         | -                                  | -         | vesicular monoamine transporter inhibitor                                         |
| I                                                                            | Dibucaine hydrochloride                                                            | -                                  | -         | local anesthetic, quinoline, sodium channel inhibitor                             |
| I                                                                            | Loperamide hydrochloride                                                           | -                                  | -         | anti-diarrheal; agonist; µ opioid receptor                                        |
| I                                                                            | Chiroquine                                                                         | Y                                  | 50 µM     | lysosomotropic amine                                                              |
| I                                                                            | Ammonium Chloride                                                                  | Y                                  | 5 mM      | lysosomotropic amine                                                              |
| <b>PHYTOCHEMICALS: supplements and active compounds from medicinal herbs</b> |                                                                                    |                                    |           |                                                                                   |
| I                                                                            | Parthenocides                                                                      | Y                                  | 40 µM     | phytochemical; HDAC1 inhibitor; anti-inflammatory (NF-κB); supplement             |
| I                                                                            | Piperlongumine                                                                     | Y                                  | 3.3 µM    | phytochemical; P13 Kinase/Akt/mTOR inhibitor; supplement                          |
| I                                                                            | Resveratrol                                                                        | Y                                  | 5 µM      | phytochemical; P13 Kinase/Akt/mTOR inhibitor; anti-oxidant; supplement            |
| I                                                                            | Tocopherol (R,S)                                                                   | -                                  | -         | phytochemical; anti-oxidant; supplement                                           |
| I                                                                            | Catestatin                                                                         | -                                  | -         | phytochemical; anti-oxidant; supplement                                           |
| I                                                                            | Dihydrocucurbitacin                                                                | -                                  | -         | phytochemical; anti-oxidant; supplement                                           |
| I                                                                            | Catechin pentaacetate                                                              | -                                  | -         | phytochemical; polyphenol; supplement                                             |
| I                                                                            | Rubescensin A                                                                      | -                                  | -         | phytochemical; diene; supplement                                                  |
| I                                                                            | Tetrandrine                                                                        | -                                  | -         | phytochemical; quinoline alkaloid; medicinal herb, active compound                |
| I                                                                            | Oridonin (isodordon)                                                               | -                                  | -         | phytochemical; diene; medicinal herb, active compound                             |
| I                                                                            | Triptolide                                                                         | -                                  | -         | phytochemical; diene; medicinal herb, active compound                             |
| I                                                                            | Erycin                                                                             | -                                  | -         | phytochemical; iridoid; medicinal herb, active compound                           |
| A                                                                            | Tanshinone I                                                                       | Y                                  | -         | phytochemical; tanshinone; medicinal herb, active compound                        |
| A                                                                            | Dihydrotanshinone I                                                                | Y                                  | -         | phytochemical; tanshinone; medicinal herb, active compound                        |
| A                                                                            | Cryptotanshinone                                                                   | Y                                  | -         | phytochemical; tanshinone; medicinal herb, active compound                        |
| No                                                                           | Tanshinone IIa (Tanshinone B)                                                      | -                                  | -         | phytochemical; tanshinone; medicinal herb, active compound                        |
| A                                                                            | 4-Methoxy Dalbergione                                                              | Y                                  | -         | phytochemical; 1,4-benzoquinone; medicinal herb, active compound                  |
| A                                                                            | 4,4'-Dimethoxy Dalbergione                                                         | Y                                  | -         | phytochemical; 1,4-benzoquinone; medicinal herb, active compound                  |
| A                                                                            | 1,4,8,8-Tetrahydroxy-2,6-dimethyl-anthraquinone                                    | Y                                  | -         | phytochemical; 9,10-anthraquinone; medicinal herb, active compound                |
| A                                                                            | Pachyrhizin                                                                        | Y                                  | -         | phytochemical; coumarin derivative; supplement                                    |
| A                                                                            | Pterysin                                                                           | Y                                  | -         | phytochemical; coumarin derivative; supplement                                    |
| A                                                                            | Urosolic Acid                                                                      | -                                  | -         | phytochemical; iriterpenoid; supplement                                           |
| A                                                                            | Astragaloside A                                                                    | -                                  | -         | phytochemical; saponin; supplement                                                |
| A                                                                            | Gastrodin                                                                          | -                                  | -         | phytochemical; glucoside; supplement                                              |
| A                                                                            | Ruscogenin                                                                         | -                                  | -         | phytochemical; pyridopyrimidine; medicinal herb, active compound                  |
| A                                                                            | Rotundone                                                                          | -                                  | -         | phytochemical; isoguaianolide; medicinal herb, active compound                    |
| A                                                                            | Grape Seed Proanthocyanidin Extract                                                | Y                                  | 100 µg/ml | phytochemical; polyphenols; supplement                                            |
| No                                                                           | Catechin and epicatechin                                                           | Y                                  | -         | phytochemicals; polyphenols; supplements                                          |
| I                                                                            | L'294002 (LY2)                                                                     | Y                                  | 15 µM     | P13kinase inhibitor; exocytosis inhibitor                                         |
| I                                                                            | Akt                                                                                | Y                                  | -         | AKT inhibitor                                                                     |
| <b>FLAVONOIDS</b>                                                            |                                                                                    |                                    |           |                                                                                   |
| A                                                                            | Icaritin; 8-Prenylkaempferol-3,7-O-methylacetate; 3,7,4',6,8,7-Hexa-hydroxyflavone | Y                                  | -         | phytochemical; supplement                                                         |
| A                                                                            | Mylricetin; 3,7,4',6,8,7-Hexa-hydroxyflavone                                       | Y                                  | -         | phytochemical; supplement                                                         |
| A                                                                            | Dihydroquercetin                                                                   | -                                  | -         | phytochemical; supplement                                                         |
| I                                                                            | Keempferol; 3,4',5,7-Tetra-hydroxyflavone                                          | Y                                  | -         | phytochemical; supplement                                                         |
| I                                                                            | Quercetin; 3,7,4',6,8,7-Penta-hydroxyflavone                                       | -                                  | -         | phytochemical; supplement                                                         |
| I                                                                            | Genistein; 3,4',7-Trihydroxy-3'-methoxyflavone                                     | -                                  | -         | phytochemical; supplement                                                         |
| I                                                                            | Apigenin; 4',5,7-Trihydroxyflavone                                                 | -                                  | -         | phytochemical; supplement                                                         |
| I                                                                            | Genistein; 4',6,8,7-Trihydroxyflavone                                              | -                                  | -         | phytochemical; supplement                                                         |
| I                                                                            | Chrysin; 5,7-Dihydroxyflavone                                                      | -                                  | -         | phytochemical; supplement                                                         |
| I                                                                            | Luteolin; 5,7-Dihydroxyflavone                                                     | -                                  | -         | phytochemical; supplement                                                         |
| I                                                                            | Luteolin 4-methyl ether; 3',5,7-Trihydroxy-4-methoxyflavone                        | -                                  | -         | phytochemical; supplement                                                         |
| I                                                                            | Baicalin; 5,6,7-Trihydroxyflavone                                                  | -                                  | -         | phytochemical; supplement                                                         |
| I                                                                            | Morin; 2',3,4',6,7-Penta-hydroxyflavone                                            | -                                  | -         | phytochemical; supplement                                                         |
| I                                                                            | 3,4'-Dihydroxyflavone                                                              | -                                  | -         | phytochemical                                                                     |
| I                                                                            | 6,4'-Dihydroxyflavone                                                              | -                                  | -         | phytochemical                                                                     |
| I                                                                            | 7,4'-Dihydroxyflavone                                                              | -                                  | -         | phytochemical                                                                     |
| <b>OTHER</b>                                                                 |                                                                                    |                                    |           |                                                                                   |
| A                                                                            | 8-Asagunin                                                                         | Y                                  | 12.5 µM   | purine analog                                                                     |
| A                                                                            | Ebselen                                                                            | Y                                  | 7.5 µM    | organoselenium                                                                    |
| A                                                                            | Ibuprofen                                                                          | Y                                  | 15 µM     | 1,4-benzoquinone; synthetic derivative of CoQ10                                   |
| A                                                                            | Lawsone (Nannonatic acid)                                                          | -                                  | -         | phytochemical; naphthoquinone                                                     |
| A                                                                            | Creatinine                                                                         | Y                                  | -         | breakdown product of creatine phosphate                                           |
| A                                                                            | Ruscogenin                                                                         | Y                                  | -         | entrapalase inhibitor (anti-diarrheal)                                            |
| A                                                                            | Piroxicam                                                                          | -                                  | -         | NSAID (prevents synthesis of prostaglandin)                                       |
| A                                                                            | Latanoprost                                                                        | -                                  | -         | NSAID (prostaglandin analog)                                                      |
| A                                                                            | Moxifloxacin Hydrochloride                                                         | -                                  | -         | fluoroquinolone                                                                   |
| A                                                                            | Picramidic Acid                                                                    | -                                  | -         | purinone                                                                          |
| A                                                                            | Anastrozole                                                                        | -                                  | -         | aromatase inhibitor                                                               |
| A                                                                            | Cysteamine Hydrochloride                                                           | -                                  | -         | cysteine and amine                                                                |
| A                                                                            | Distyrenylcyclopropane                                                             | -                                  | -         | irritant                                                                          |
| I                                                                            | Obussquinone                                                                       | -                                  | -         | phytochemicals; quinone, irritant                                                 |
| I                                                                            | Crimamine                                                                          | -                                  | -         | phytochemicals; poison                                                            |
| I                                                                            | Benzalkonium chloride                                                              | -                                  | -         | cationic surfactant                                                               |

\* compounds in bold screened positive and were verified by triplicate retesting using compounds from the libraries.
